# Supplementary material for: Fox dietary ecology as a tracer of human impact on Pleistocene ecosystems
Source: PLoS One. 2020 Jul 22;15(7):e0235692. doi: 10.1371/journal.pone.0235692 (PMC7375521; doi:10.1371/journal.pone.0235692)
Supplement: S4 Table — Niche parameters of all niches (n>3) calculated with SIBER. TA = Total Area (= convex hull), SEA = Standard Ellipse Area, SEAc = Standard Ellipse Area corrected to small sample size. (XLSX) [file pone.0235692.s014.xlsx]

## Sheet: S4 Areas
	Large Carnivores
	Middle Pal.	Aurignacian	Gravettian
TA [‰²]	2.08	5.19	4.195
SEA [‰²]	1.4101	1.57473	1.87482
SEAc [‰²]	1.69211	1.64971	2.08313
	High d15N foxes
	Middle Pal.	Aurignacian	Gravettian
TA [‰²]	0.46	2.27	1.26
SEA [‰²]	0.375592	0.829131	1.03625
SEAc [‰²]	0.46949	0.892911	1.38167
	Intermediate d15N foxes
	Aurignacian	Gravettian
TA [‰²]	0.59	1.58
SEA [‰²]	0.533738	2.20499
SEAc [‰²]	0.667172	3.30749
